# Supplementary material for: Porous 0.2Li2MnO3·0.8LiNi0.5Mn0.5O2nanorods as cathode materials for lithium-ion batteries
Source: Royal Society of Chemistry journal article supplement (doi:10.1039/c3ta14228k), 2013-12-11
Supplement: c3ta14228k.pdf [file c3ta14228k.pdf]

## Electronic Supplementary Information (ESI)

### Porous $0.2\text{Li}_2\text{MnO}_3 \cdot 0.8\text{LiNi}_{0.5}\text{Mn}_{0.5}\text{O}_2$ nanorods as cathode materials for lithium-ion batteries

Jingang Yang, Fangyi Cheng,\* Xiaolong Zhang, Haiyan Gao, Zhanliang Tao and Jun Chen\*

Key Laboratory of Advanced Energy Materials Chemistry (Ministry of Education),

College of Chemistry, Nankai University, Tianjin 300071, P. R. China; Collaborative

Innovation Center of Chemical Science and Engineering (Tianjin), Nankai University,

Tianjin 300071, P. R. China.

Fax: +86-22-23509571; Tel: +86-22-23504482; E-mail: fycheng@nankai.edu.cn;

chenabc@nankai.edu.cn

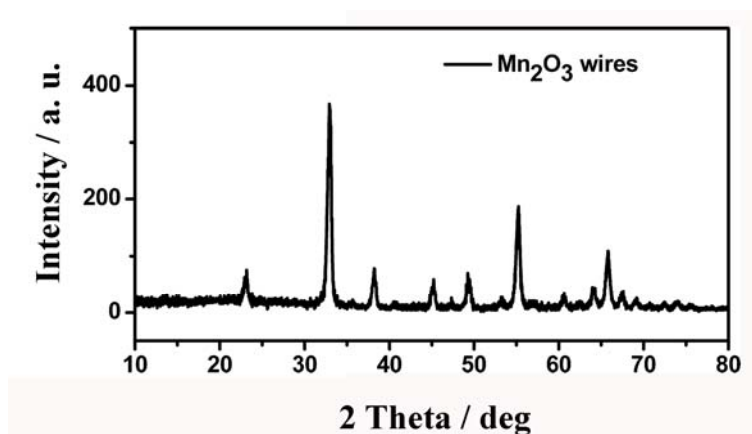

Fig. S1. The XRD profiles of Mn<sub>2</sub>O<sub>3</sub> nanowires.

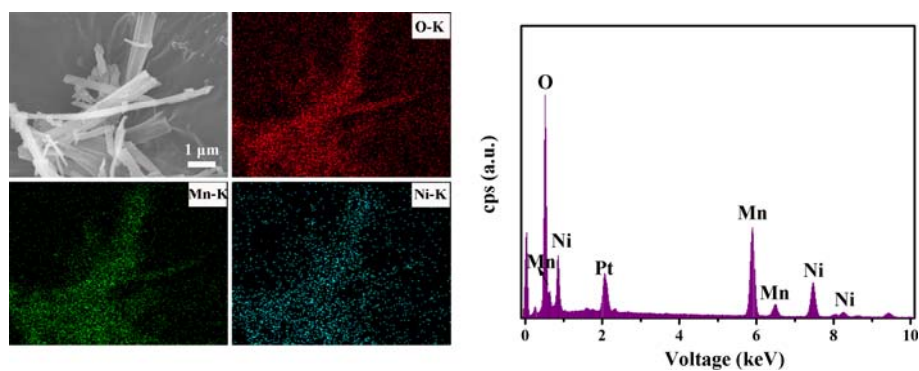

Fig. S2. The EDS mapping of LLNMO PNR showing the presence of Ni, Mn and O.

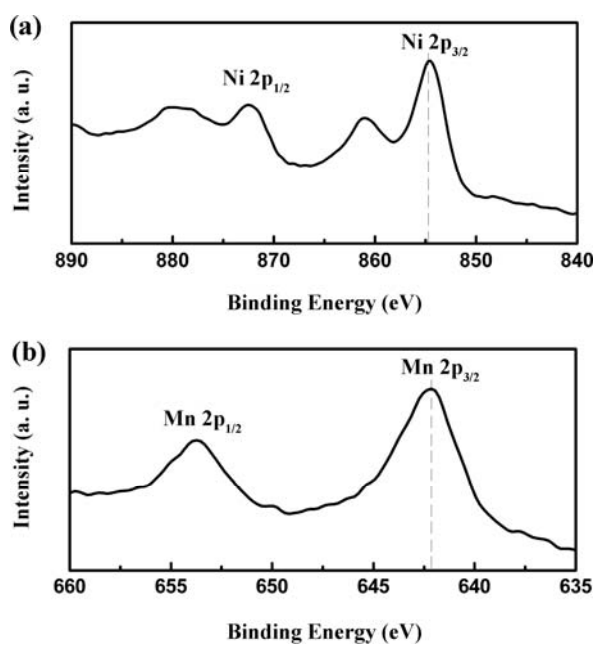

Fig. S3. XPS spectra of Ni 2p and Mn 2p for LLNMO PNR.

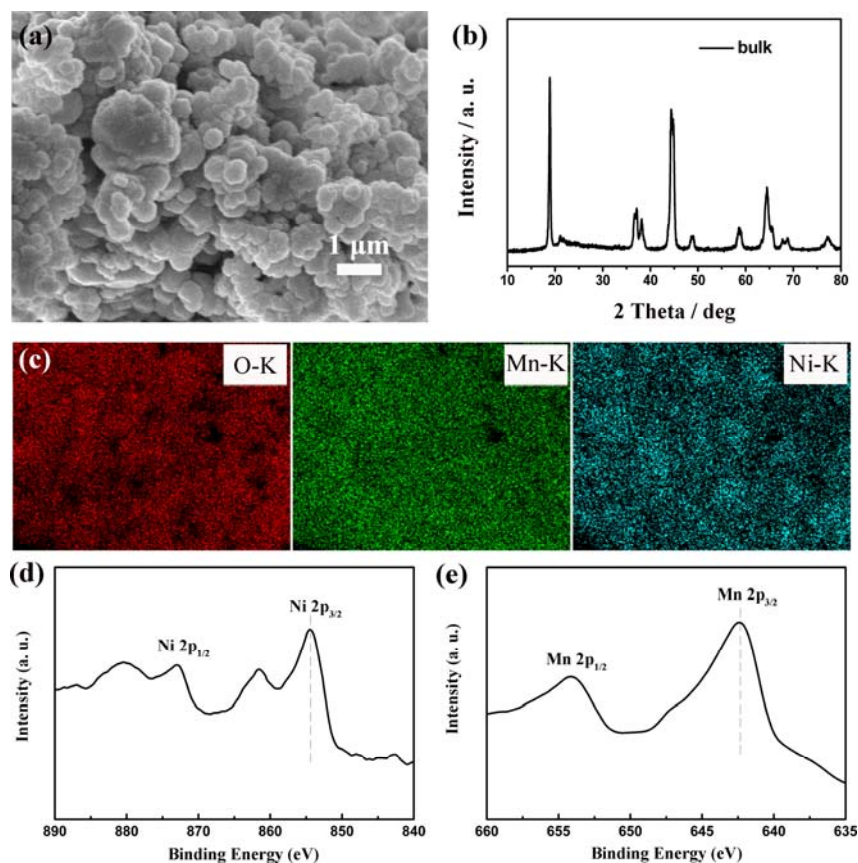

Fig. S4. (a) SEM image, (b) XRD profile, (c) EDS mapping and (d, e) XPS spectra of LLNMO bulk.

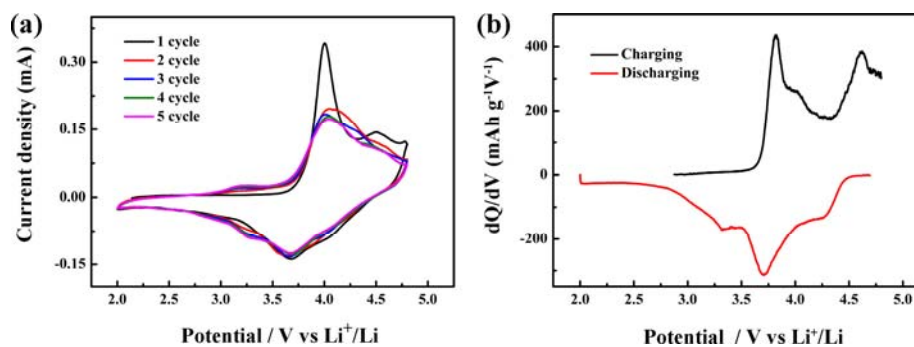

Fig. S5. (a) Cyclic voltammograms of LLNMO PNR at a scan rate of 0.2 mV/s in the potential range of 2.0–4.8 V. (b) Differential capacities versus voltage ( $dQ/dV$ ) of the as-prepared LLNMO PNR at 0.2 C rate. In the CVs, the two oxidation peaks in the initial cycle correspond to the two well-defined regions in the initial charge-discharge

curve. The front region at a lower voltage (<4.5 V) is attributed to  $\text{Ni}^{2+}/\text{Ni}^{4+}$  redox resulting from  $\text{LiNi}_{0.5}\text{Mn}_{0.5}\text{O}_2$ , which is the main source of the reversible capacity. The subsequent flat region above 4.5 V can be attributed to the irreversible removal of  $\text{Li}_2\text{O}$  from  $\text{Li}_2\text{MnO}_3$ , which is the activation of the materials and generally results in a large initial irreversible capacity. However, after the initial charge-discharge, the two regions overlay, resulting in a broad peak in the following CV curves. The decrease of peak intensity also reflects the capacity fade.

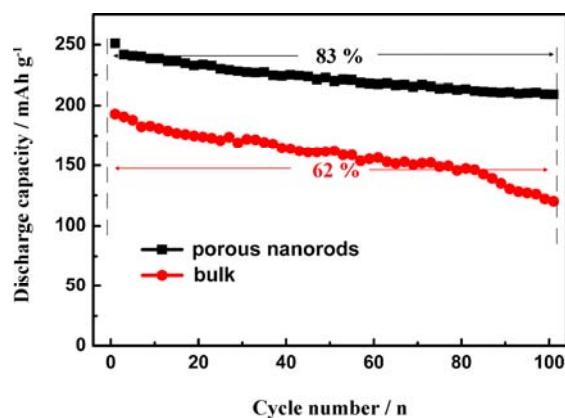

Fig. S6. Cycling performance of LLNMO PNR and bulk at 1 C discharge rate and 0.2 C charge rate.

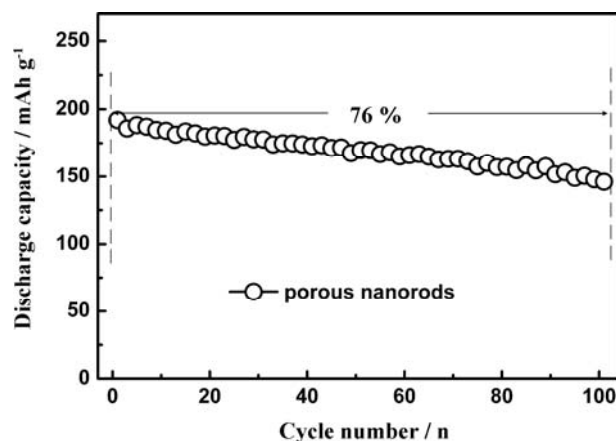

Fig. S7. Cycling performance of LLNMO PNR at 5 C discharge rate and 0.2 C charge

rate.

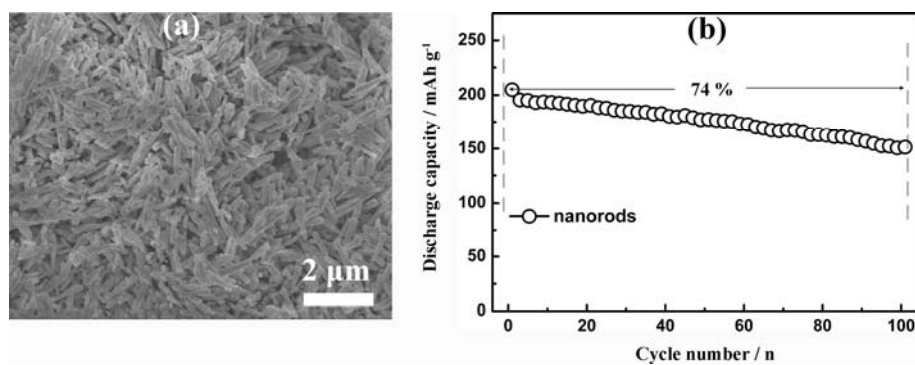

Fig. S8. (a) SEM of LLNMO nanorods and (b) cycling performance of LLNMO nanorods at 1 C discharge rate and 0.2 C charge rate. LLNMO nanorods were synthesized in a manner similar to that of LLNMO PNR, only using  $\beta$ -MnO<sub>2</sub> nanorods instead of Mn<sub>2</sub>O<sub>3</sub> porous nanowires.
